# Supplementary material
Source: MDPI journal article supplement (https://www.mdpi.com/1999-4907/15/3/470)
Supplement: s1 [file s1]

## Supplementary Materials

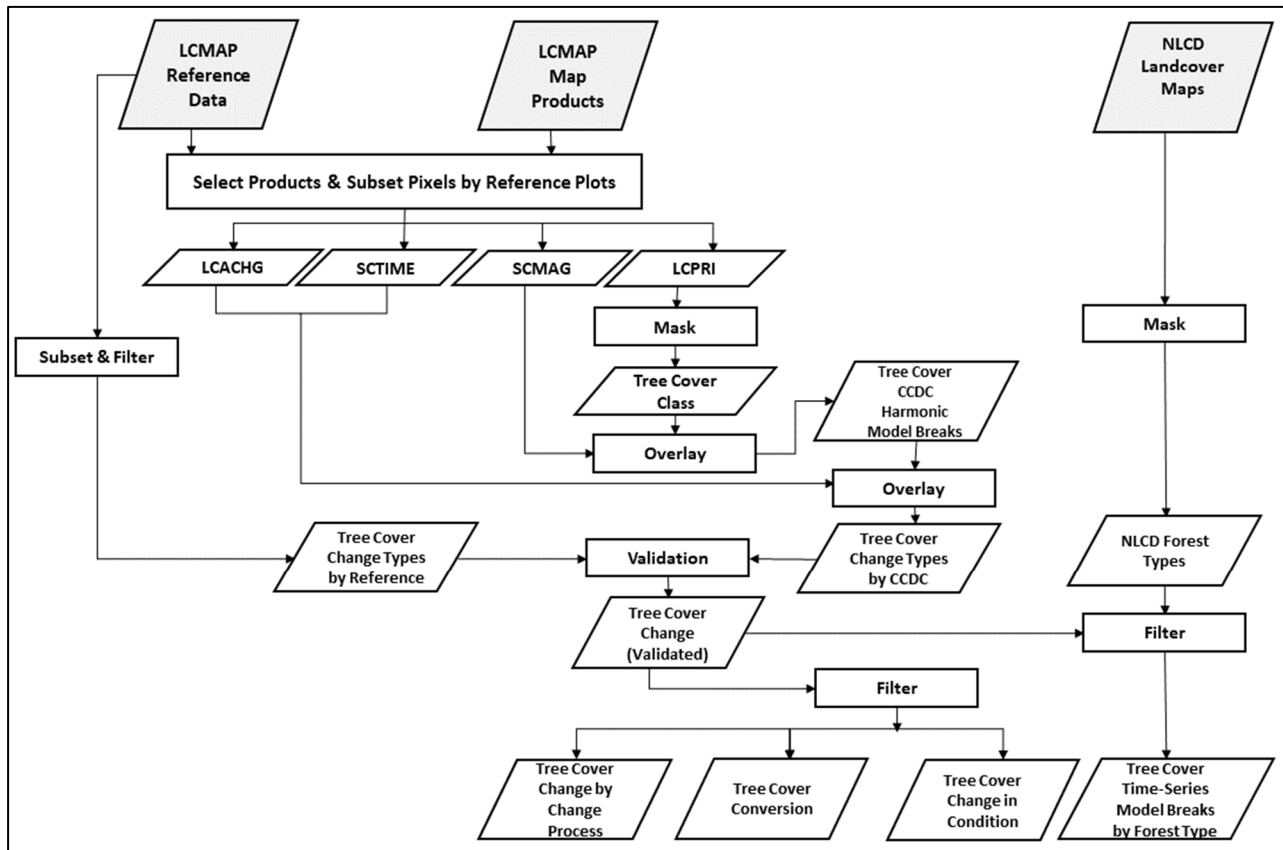

**Figure S1.** A flowchart of methods for obtaining Continuous Change Detection and Classification (CCDC) harmonic model breaks that were tree cover conversion or change in tree cover condition based on Land Change Monitoring Assessment and Projection (LCMAP) data products and map validation reference data. LCPRI, primary land cover; LCACHG, annual land cover change; SCTIME, time of spectral change; SCMAG, change magnitude; NLCD, National Land Cover Database.
